1 **Bacterial colonisation dynamics of household plastics in a coastal environment**

2

3 Luke Lear<sup>1+</sup>, Daniel Padfield<sup>1\*</sup>, Tirion Dowsett<sup>1</sup>, Maia Jones<sup>1</sup>, Suzanne Kay<sup>1</sup>, Alex Hayward<sup>2</sup> and

4 Michiel Vos<sup>1</sup>

5

6 1= European Centre for Environment and Human Health, University of Exeter Medical School,

7 Environment and Sustainability Institute, Penryn Campus, TR10 9FE, United Kingdom

8 2= Department of Biosciences, University of Exeter, Penryn Campus, TR10 9FE, United Kingdom

9 += these authors contributed equally

10 \*= corresponding author, [d.padfield@exeter.ac.uk](mailto:d.padfield@exeter.ac.uk)

11

12 Running title: colonisation of marine plastics

13

14 Keywords: plastic pollution, virulence, pathogens, colonisation, time series, *Galleria mellonella*,

15 plastisphere, marine biofilms

## 16 **Abstract**

17 Accumulation of plastics in the marine environment has widespread detrimental consequences  
18 for ecosystems and wildlife. Marine plastics are rapidly colonised by a wide diversity of bacteria,  
19 including human pathogens, posing potential risks to human health. Here, we investigate the  
20 effect of polymer type, residence time and estuarine location on bacterial colonisation of common  
21 household plastics, including pathogenic bacteria. To do so, we submerged five main household  
22 plastic types: low-density PE (LDPE), high-density PE (HDPE), polypropylene (PP), polyvinyl  
23 chloride (PVC) and polyethylene terephthalate (PET) at an estuarine site in Cornwall (U.K.) and  
24 tracked bacterial colonisation dynamics. Using both culture-dependent and culture-independent  
25 approaches, we found that bacteria rapidly colonised plastics irrespective of polymer type. While  
26 biofilm community composition changed with colonisation time, no difference was observed  
27 between polymer types. Likewise, the presence of pathogenic bacteria, quantified using the insect  
28 model *Galleria mellonella*, increased over a five-week period, with no consistent differences  
29 observed between polymer types. Pathogens isolated from plastic biofilms using *Galleria*  
30 enrichment included *Serratia* and *Enterococcus* species and harboured a wide range of  
31 antimicrobial resistance genes. Our findings show that plastics in coastal waters are rapidly  
32 colonised by a wide diversity of bacteria, including known human pathogens, independent of  
33 polymer type.

34

## 35 **Introduction**

36 Plastics pollution has huge negative impacts on marine environments (1). In 2017, around 348  
37 million tonnes of plastic were produced globally (2). This figure is increasing year on year (2),  
38 with a significant percentage of all plastics produced ultimately finding their way into the marine  
39 environment (3, 4). Plastics have multiple adverse effects on a wide diversity of wildlife, including  
40 entanglement, ingestion and physical damage (e.g. (5-8)). Moreover, it is increasingly recognised  
41 that there is potential for plastic pollution to pose a threat to human health (9), from the effects  
42 of ingestion of micro- and nano particles (e.g. via shellfish or drinking water (10)) followed by

43 cellular uptake (11), to decreased psychological wellbeing through pollution of the natural  
44 environment (12).

45         The surface of plastic fragments in aquatic environments is rapidly colonised by  
46 microorganisms, leading to diverse biofilm communities distinct from that of the surrounding  
47 seawater (13-15). Bacterial colonisation of marine plastics is dependent on a variety of abiotic  
48 factors, including season, location, colonisation time and polymer type (13, 16, 17). A growing  
49 number of studies have used 16S amplicon sequencing approaches to specifically investigate  
50 bacterial colonisation of different substrates. Clear differences in bacterial community  
51 composition between plastic and other surfaces (e.g. wood or glass) have been reported (e.g. (18,  
52 19)) (but see (20)). Differences in plastic colonisation based on beta-diversity metrics have been  
53 mixed. Differences have been reported between polystyrene (PS) and polyethylene (PE) and  
54 polypropylene (PP) (21, 22), between PS and PP, PE and polyethylene terephthalate (PET) (23)  
55 and between PE and PET (24). However, other studies have failed to find biofilm community  
56 differences between plastics, e.g. between polyethylene (PE), polypropylene (PP) and  
57 polystyrene (PS) (18), between PE and PS (20, 25) or between PE and PP (19).

58         Among bacterial colonisers of marine plastics are pathogenic species known to cause  
59 disease in animals (e.g. (26, 27)) and humans (e.g. (28-30)). Plastics could serve as potential  
60 vectors for pathogens (30) and/or bacteria carrying antimicrobial resistance genes (31). Plastic  
61 pollution could also result in elevated horizontal gene transfer by facilitating close contact (32),  
62 and plastic-sorbed contaminants (33) could potentially speed up antimicrobial resistance  
63 development (34). Therefore, in addition to direct threats related to ingestion, plastic-borne  
64 bacteria may also pose an infection risk to human and wildlife health (35-37). However, previous  
65 work has concentrated on indirect quantification of potential pathogens using agar cultivation or  
66 amplicon sequencing which cannot quantify the virulence or pathogenicity of bacteria,

67         The aim of this study is to investigate the colonisation dynamics of bacterial pathogens on  
68 five of the most common types of household plastics (low-density PE (LDPE), high-density PE  
69 (HDPE)), polypropylene (PP), polyvinyl chloride (PVC) and polyethylene terephthalate (PET)), at

70 multiple coastal sites, and over time. We focus on plastic colonisation in coastal waters where  
71 terrestrial inputs of plastics (17) and human-, animal- and soil- associated pathogens is highest  
72 (38). We investigate bacterial colonisation dynamics on plastics incubated in the marine  
73 environment by quantifying density for subsets of cultivable diversity and testing for differences  
74 in taxonomic diversity via 16S amplicon sequencing. We directly tested for the presence of  
75 pathogens on biofilm plastics, employing a recently developed selective isolation method using  
76 the *Galleria mellonella* insect virulence model (39). We performed two separate experiments: (i)  
77 we measured bacterial colonisation after seven weeks across three different locations,  
78 quantifying bacterial colonisation through cultivation-based approaches and measuring the  
79 presence of pathogens using the *Galleria* assay; (ii) we focused on one location close to shore and  
80 in addition to cultivation and the *Galleria* assay, used 16S rRNA amplicon sequencing to quantify  
81 bacterial colonisation over time.

82

## 83 **Materials and Methods**

### 84 Plastics

85 Five plastic types were collected from household recycling: low-density polyethylene (LDPE)  
86 from sandwich bags, high-density polyethylene (HDPE) from milk bottles, polypropylene (PP)  
87 from peanut butter tubs, polyvinyl chloride (PVC) from roofing material and polyethylene  
88 terephthalate (PET) from drink bottles. Plastics were cut into 85mm by 25mm strips with a 5mm  
89 diameter hole made at one end using a holepunch. One sample of each type of plastic was attached  
90 to a large cable tie via smaller, colour coded cable ties to form a ring (Figure 1a). Rings were then  
91 attached to metal mesh bags using cable ties (Figure 1b). Plastics were sterilised using 70%  
92 ethanol before environmental incubation.

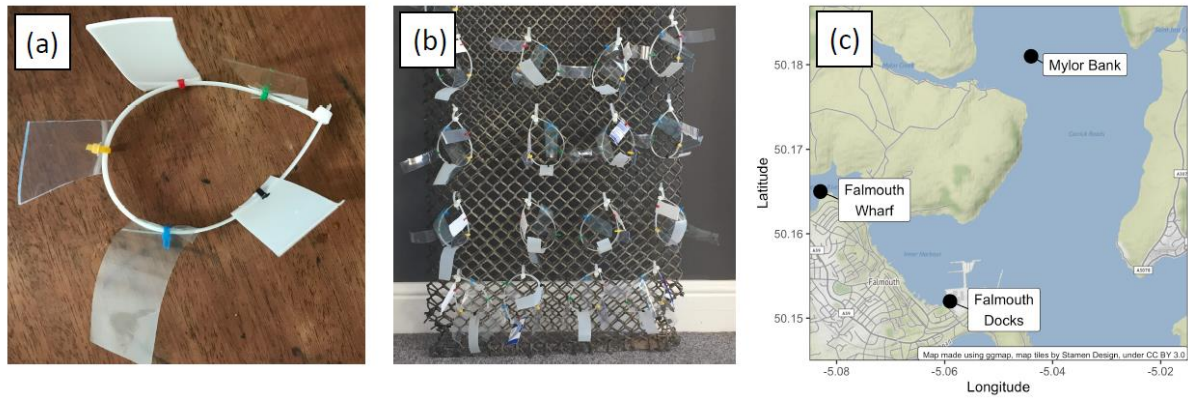

93

94 **Figure 1. Overview of the methods used to submerge household plastics in the Fal**

95 **Estuary.** (a) Strips of LDPE, HDPE, PP, PET and PVC strips were attached to a big cable tie

96 ring using smaller, colour coded cable ties. (b) Each large ring was attached to a metal mesh

97 bag using cable ties which was then submerged at each site (c) Sites used in this study:

98 Falmouth Docks, Falmouth Wharves and Mylor Bank. All three sites were used in the first

99 'Location' experiment whereas the second 'Colonisation' experiment occurred only at the

100 Falmouth Docks site.

101

### 102 Location experiment

103 A total of 18 rings (attached to three mesh bags) were deployed on 10th December 2019 at three

104 sampling sites in the Fal Estuary (Falmouth, Cornwall, UK): Falmouth Docks (50.152, -5.059),

105 Falmouth Wharves (50.165, -5.083) and Mylor Bank (50.181, -5.044) (Figure 1c) with help from

106 Cornwall Port Health Authority. Mylor Bank was further from the shore and was further away

107 human habitation (Figure 1c). The bags were attached to pontoons at Falmouth Wharves and

108 Falmouth Docks and to a buoy at Mylor Bank using a rope, ensuring the bags were fully

109 submerged. Plastic rings were retrieved from each site on 28th January 2020 (after 7 weeks) and

110 placed separately in a sterile plastic box for transportation. Sample processing commenced

111 within one hour of collection.

112

113

114

115 Colonisation experiment

116 To measure differences in the bacterial colonisation of different plastic types through time, 28  
117 rings of plastics (four timepoints, seven replicates) were attached to a single metal mesh bag and  
118 submerged as described above at the Falmouth Docks site on February 4<sup>th</sup>, 2020. One set of plastic  
119 rings were collected on February 11<sup>th</sup>, 18<sup>th</sup> and 24<sup>th</sup> and March 3<sup>rd</sup> (weeks 1, 2, 3 and 5) and  
120 brought back to the lab.

121

122 Biofilm processing

123 Under sterile conditions, each plastic strip was cut in half using sterilised scissors and placed in a  
124 50mL falcon tube containing 10mL sterile NaCl buffer (9g/L; Fisher Chemicals, Loughborough,  
125 UK) and five sterile glass beads to facilitate removal of biofilm (Millipore Colirollers Plating Beads,  
126 Billerica MA, USA). Each tube was vortexed for 60 seconds at 2500 r.p.m. to remove and suspend  
127 plastic biofilms. As our focus was on bacteria of terrestrial origin, specifically potential human  
128 pathogens, serial dilutions of biofilm suspensions were plated on LB agar (Fisher BioReagents,  
129 Loughborough, UK) and coliform agar (Millipore Sigma, Billerica MA, USA) and incubated at 37°C.  
130 LB agar selects for relatively fast-growing bacteria; coliform agar was used to quantify both  
131 coliform bacteria and *E. coli*. Colony forming units (CFU) were counted after 24 hours of  
132 incubation at 37°C. All counts were standardised to CFU/cm<sup>2</sup>. Biofilm suspensions were stored in  
133 glycerol (Fisher Chemicals, Loughborough, UK) (20% final concentration) at -80°C.

134

135 *Galleria mellonella* virulence assay

136 *G. mellonella* larvae were purchased from Livefood U.K. (<http://www.livefood.co.uk>) and used  
137 within one week of purchase. A 100µL Hamilton syringe (Sigma-Aldrich Ltd, Gillingham, UK) with  
138 0.6 x 30mm needles (BD Microlance 3, Becton Dickinson, Plymouth, UK) was used to inject the  
139 larvae with 10µL of defrosted biofilm freezer stock into the last left proleg, using 20 larvae  
140 (location experiment) or 10 larvae (colonisation experiment) for each sample. The larvae were  
141 anaesthetised on ice for 30 minutes before injection. Needles were sterilised between samples by

142 flushing with 70% ethanol followed by NaCl buffer. Two negative controls for the experiment  
143 were used: a buffer control using 10 $\mu$ L of sterile NaCl to control for the impact of physical trauma,  
144 and a no-injection control to account for background larvae mortality. After injection, larvae were  
145 incubated at 37°C and inspected at 24-, 48- and 72-hours post-injection (location experiment) or  
146 24- and 48 hours post-injection (colonisation experiment) to record mortality. Larvae were  
147 scored as dead if they did not respond to touch stimuli (39).

148

#### 149 Isolation of pathogenic bacteria

150 To isolate pathogens causing *G. mellonella* mortality, we reinjected 20 of the most virulent  
151 communities into ten larvae as described above. Larvae demonstrating melanisation – a key  
152 indicator of infection – were anaesthetised by placing on ice before their haemocoel was extracted.  
153 To extract haemocoel, 70% ethanol was used to sterilise the area around the last left proleg before  
154 the proleg was removed using sterile micro-scissors and the haemocoel collected using a pipette.  
155 This method is advantageous over whole larvae destruction as it minimises contamination with  
156 skin and gut bacteria (Hernandez et al 2019). Collected haemocoel (~5-15 $\mu$ L) was diluted in  
157 500 $\mu$ L of buffer, plated onto LB agar and incubated for 24 hours. Colonies were then picked and  
158 grown in 750 $\mu$ L of LB at 37°C for 24 hours. Cultures were frozen at -80°C in glycerol (at a final  
159 concentration of 25%). Defrosted stocks were diluted to (1 x 10<sup>5</sup> CFU/mL) and injected into ten  
160 larvae which were then incubated for 18 hours; deceased larvae confirmed that isolated clones  
161 were pathogenic and not commensal gut or skin bacteria.

162

#### 163 16S rRNA amplicon sequencing

164 DNA was extracted from biofilms using a DNeasy UltraClean Microbial Kit (Qiagen, Hilden,  
165 Germany) according to the standard protocol with the only modification to increase the initial  
166 centrifugation speed and time (10K x g for 10 minutes) to pellet bacteria suspended in the 20%  
167 glycerol stock. DNA concentrations were quantified using the Qubit HS DNA kit (Invitrogen),  
168 purity was assessed using nanodrop 260:280 ratios, and integrity was assessed using a 1%

169 agarose gel. A 251bp conserved fragment in the V4 hypervariable region was targeted using  
170 N515f and N806r primers (<https://earthmicrobiome.org/protocols-and-standards/16s/>) with  
171 phasing and a pool of indexed primers suitable for multiplex sequencing with Illumina  
172 technology. Sequencing was performed using an Illumina MiSeq V2 500 by the University of  
173 Exeter Sequencing Service. Sequencing adapters and any bases below a score of Q22 were  
174 removed, alongside any reads <150 bp using '*Cutadapt*' (40). We then processed and analysed the  
175 sequence data in R (v4.0.3) (41) using the packages '*dada2*' (42) and '*phyloseq*' (43). Following  
176 the standard full-stack workflow, we estimated error rates, inferred and merged sequences,  
177 constructed a sequence table, removed chimeric sequences and assigned taxonomy. During  
178 processing, the first 25bp of forward and reverse reads were trimmed. Taxonomies were  
179 assigned to amplicon sequence variants (ASVs) using the SILVA database (44). We estimated  
180 phylogeny using '*fasttree*' (45) to allow for the calculation of Unifrac distances (which take into  
181 account the phylogenetic distance between ASVs) between communities. We then removed any  
182 reads that had not been assigned to at least the phylum level (613 of 12564 unique ASVs) and any  
183 sequences assigned to the phylum Cyanobacteria. Processing and filtering steps resulted in three  
184 samples containing fewer than 10,000 reads being removed (one replicate from week 1 LDPE,  
185 one replicate from week 1 HDPE, and one replicate from week 2 of PP), with the remaining  
186 samples having a maximum read number of 673,525, a minimum of 10,364 and a median of  
187 24,920.

188

### 189 *Whole Genome Sequencing*

190 DNA isolation, Illumina HiSeq sequencing and basic bioinformatics were performed through  
191 MicrobesNG, Birmingham, UK. Vials containing beads inoculated with liquid culture were washed  
192 with extraction buffer containing lysostaphin and RNase A, and incubated for 25 minutes at 37°C.  
193 Proteinase K and RNaseA were added and vials were incubated for a further 5 minutes at 65°C.  
194 Genomic DNA was purified using an equal volume of SPRI beads and resuspended in EB buffer.  
195 DNA was quantified in triplicate using the Quantit dsDNA HS assay in an Eppendorff AF2200 plate



196 reader. Genomic DNA libraries were prepared using the Nextera XT Library Prep Kit (Illumina,  
197 San Diego, CA, USA) following the manufacturer's protocol with the following modifications: two  
198 nanograms of DNA instead of one were used as input, and PCR elongation time was increased to  
199 1 minute from 30 seconds. DNA quantification and library preparation were carried out on a  
200 Hamilton Microlab STAR automated liquid handling system. Pooled libraries were quantified  
201 using the Kapa Biosystems Library Quantification Kit for Illumina on a Roche LightCycler 96 qPCR  
202 machine. Libraries were sequenced on the Illumina HiSeq using a 250bp paired end protocol.

203 Sequencing reads were adapter trimmed using '*Trimmomatic 0.39*' with a sliding window  
204 quality cutoff of Q15 (46). De novo assembly was performed on samples using '*Unicycler v0.4.8*'  
205 (47), and summary stats of assemblies were calculated using CheckM v1.1.3 (48). Genome  
206 assemblies were visualised using Bandage (49) and split when there were two large non-  
207 contiguous assemblies which were then run separately through the other stages. The assemblies  
208 which were likely two or more species were identifiable by a high contamination value (~100%).  
209 Contigs were annotated using Prokka 1.14.6 (50). Taxonomic classification of our assemblies was  
210 performed using '*MMSeqs2 13.45111*' (51) using the GTDB database (52), and of 16S gene  
211 amplicons using '*dada2*' (53) using the SILVA reference database (44). Assemblies were screened  
212 for antimicrobial resistance genes and virulence factors using '*AMRFinderPlus v3.10.1*' (54).

213

## 214 Statistical analyses

### 215 *Analysing differences in culturable abundance between plastics, sites, and time*

216 All analyses were conducted using the statistical programming language R v4.0.3 (41) and all  
217 graphs were produced using the '*ggplot2*' package (55). Linear models were used to examine  
218 differences in culturable bacterial abundance between locations. The response variable was  $\log_{10}$   
219 abundance+1 cm<sup>-2</sup> plastic to normalise the residuals, and the predictors were location, plastic  
220 type and their interaction. Separate models were run for each category of culturable bacteria  
221 (bacteria culturable on LB, coliform and *E. coli*). Model selection was performed using using  
222 likelihood ratio tests. Pairwise multiple comparisons to examine significant differences among

223 locations or plastics were performed using the R package ‘*emmeans*’ (56). Changes in abundance  
224 through time during colonisation were analysed using linear models. The response variable was  
225 again  $\log_{10}$  abundance+1 cm<sup>-2</sup> plastic with week of sampling as a continuous predictor and type  
226 of plastic as an interaction term. Separate linear models were run for all three categories of  
227 culturable bacteria. Model selection and post-hoc multiple comparisons were performed as  
228 above.

229

### 230 *Analysing virulence of plastisphere biofilms*

231 Survival of *Galleria* inoculated with bacteria isolated from biofilms was quantified as a measure  
232 of virulence of the plastisphere communities. Survival curves were fitted using Bayesian  
233 regression in the package ‘*rstanarm*’ (57) and parameters were estimated using ‘*tidybayes*’ (58).  
234 Compared to the popular Cox model, Bayesian implementation can more easily visualise  
235 uncertainty and better handle random effects. For survival curves of *Galleria* injected with  
236 bacteria isolated from 7-week-long biofilms, we fitted a proportional hazards model with an M-  
237 splines baseline hazard, with site, plastic, and their interaction as fixed effects and a random effect  
238 of biofilm, as multiple *Galleria* were all inoculated with the same biofilm. For the survival curves  
239 through time at Falmouth Docks, we fitted the same model, but with week, plastic, and their  
240 interaction as fixed effects and a random effect of biofilm. Models were run for 3000 iterations  
241 and three chains were used with uninformative priors. Model convergence was assessed using  
242 Rhat values (all values were 1) and manual checking of chain mixing. For both models, log hazards  
243 were estimated for each plastic in each site or week. To examine differences in virulence among  
244 sites and plastics, hazard ratios were calculated as the exponential of the difference between two  
245 log hazards. A hazard ratio above one indicates an increase in virulence compared to the baseline  
246 treatment, with a value below one indicating a decrease in virulence compared to the baseline.  
247 Median log hazard across treatments was used as the baseline. We calculated median hazard  
248 ratios with 95% credible intervals and the probability that the given hazard ratio was above 1.  
249 Median hazard ratios with 95% credible intervals that do not cross 1 indicate a significant

250 difference in virulence between two factors. For visualisation purposes, we show the hazard ratio  
251 of each location/polymer type where the baseline is the median log hazard in each experiment,  
252 allowing differences in virulence between sites/polymer types to be easily seen.

253

#### 254 *Analysing plastisphere community composition between different plastic types*

255 To investigate how plastisphere bacterial communities changed, we examined changes in  
256 community composition, alpha and beta diversity through time. We used weighted Unifrac  
257 distance (59) as a measure of compositional dissimilarity between communities, which weights  
258 branches in a phylogeny based on the relative abundance of each ASV. As this distance requires a  
259 rooted phylogeny, we rooted the tree based on the longest tree branch terminating in a tip.  
260 Differences in composition between plastic communities were analysed using the R packages  
261 '*phyloseq*' (43) and '*vegan*' (60). We tested whether week of colonisation and plastic type altered  
262 community composition using permutational ANOVAs. Permutational ANOVA tests were run  
263 using '*vegan::adonis*' with 9999 permutations and differences in group dispersion (which test for  
264 differences in beta diversity between treatments) were analysed using '*vegan::betadisper*'. An  
265 overall model including plastic type and colonisation week as interacting factors was performed  
266 first. We then split the data to examine an overall effect of plastic type by performing a separate  
267 PERMANOVA for each week and performing pairwise PERMANOVAs between each plastic type  
268 to assess differences. P values were corrected using the *fdr* method (61). When looking at  
269 differences in beta diversity, we calculated the distance from the centroid of each plastic by week  
270 combination, and then ran a linear model where distance from the centroid was the response  
271 variable, and plastic and week were potentially interacting factors. Model selection was  
272 performed as above.

273 To investigate differences in alpha diversity and evenness between communities, we  
274 rarefied data so that all samples had the same number of reads (11,045). Richness (alpha  
275 diversity) was taken as the total number of ASVs and evenness was calculated as Pielou's  
276 evenness (62). The amount of change and variation in the number of ASVs across weeks and

277 across plastic types was tested using linear models. Total ASVs were  $\log_{10}$ -transformed to  
278 normalise residuals, with plastic type and week as potentially interacting predictors. As we did  
279 not expect alpha diversity to necessarily change linearly across weeks, we included it as a  
280 categorical predictor. For evenness, the analysis was the same, but without any transformation  
281 on the response. Model selection was performed as stated earlier.

282

## 283 **Results**

### 284 *Bacteria abundance was lowest on plastics further away from human habitation*

285 To determine the effects of location and polymer type on bacterial colonisation, five different  
286 plastics were incubated at one-meter depth at three estuarine locations near Falmouth, U.K. After  
287 seven weeks of submergence, the abundance of bacteria culturable on LB, coliforms, and *E. coli*,  
288 significantly differed between locations (ANOVA between models with and without location as a  
289 predictor: bacteria culturable on LB:  $F_{2,83} = 69.32$ ,  $p < 0.001$ ; coliforms:  $F_{2,83} = 54.34$ ,  $p < 0.001$ ; *E.*  
290 *coli*:  $F_{2,83} = 14.44$ ,  $p < 0.001$ ) (Figure 2). Across the three quantified groups, abundance was  
291 consistently highest at Falmouth Dockyard, which is located closest to human habitation (bacteria  
292 culturable on LB: mean = 724 CFU cm<sup>2</sup>, 95%CI = 490 - 1096; coliform: mean = 50 CFU cm<sup>2</sup>, 95%CI  
293 = 30 - 83 *E. coli*: mean = 3.3 CFU cm<sup>2</sup>, 95%CI = 2.4 - 4.6) and lowest at Mylor Bank which is furthest  
294 from the shore and human habitation (bacteria culturable on LB: mean = 25 CFU cm<sup>2</sup>, 95%CI = 17  
295 - 38; coliform: mean = 1.2 CFU cm<sup>2</sup>, 95%CI = 0.7 - 2.1; *E. coli*: mean = 1.04 CFU cm<sup>2</sup>, 95%CI = 0.76  
296 - 1.4), although not all contrasts were significant (Table S1).

297 Significant differences in abundance were found between plastics (ANOVA between  
298 models with and without plastic as a predictor: bacteria culturable on LB:  $F_{4,83} = 4.65$ ,  $p = 0.002$ ;  
299 coliforms:  $F_{4,83} = 4.05$ ,  $p = 0.005$ ; *E. coli*:  $F_{4,83} = 3.11$ ,  $p = 0.019$ ), but there was no significant  
300 interaction between location and plastic (ANOVA between models with and without interaction  
301 between plastic and location:  $p > 0.05$  for LB, coliform and *E. coli*). Abundance was consistently  
302 highest on HDPE, but this was only significant across all three quantified groups when compared

303 to LDPE (Tukey comparison between HDPE and LDPE: bacteria culturable on LB:  $t = 3.86$ ,  $p =$   
304  $0.002$ ; coliform:  $t = 3.88$ ,  $p = 0.0018$ ; *E. coli*:  $t = 3.31$ ,  $p = 0.0118$ ; Table S1).

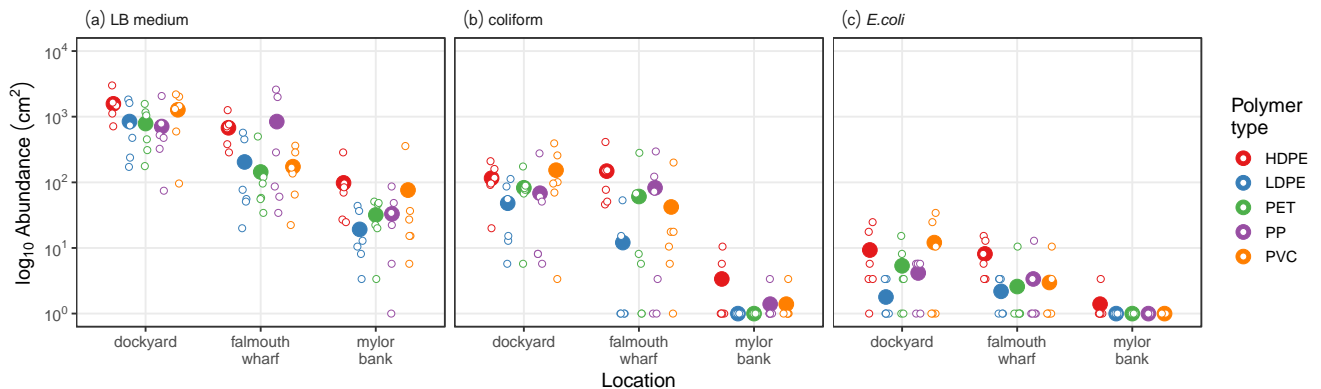

305  
306 **Figure 2. Abundance of (a) bacteria on LB medium, (b) coliform bacteria and (c) *E.***  
307 ***coli* found across polymer types and locations.** Large points represent mean abundances  
308 of plastics at each site and small points represent individual replicates.

309

310 *Rate of bacterial colonisation did not differ between polymer types*

311 To investigate bacterial colonisation of plastics through time, we performed a second experiment  
312 at the Falmouth Docks site only, and sampled plastics after one, two, three and five weeks of  
313 submergence. During this period, the abundance of bacteria growing on LB, coliforms, and *E. coli*  
314 all increased (slope of increase in abundance in best model: bacteria culturable on LB: 0.23,  
315 95%CI = 0.17-0.29; coliform = 0.32, 95%CI = 0.25-0.39; *E. coli*: 0.17, 95%CI = 0.13-0.19) (Figure  
316 3). For both bacteria culturable on LB and coliforms, the increase in abundance occurred  
317 consistently across all types of plastic (ANOVA with and without plastic as a predictor: all  $p$  values  
318  $> 0.05$ ). The only difference in colonisation rate between plastics was found for *E. coli* (ANOVA  
319 with and without the interaction between week and plastic:  $F_{4,130} = 5.95$ ,  $p = 0.0002$ ), where the  
320 rate of colonisation was lowest on LDPE (slope of increase in abundance in best model: *E. coli* on  
321 LDPE: 0.05, 95%CI = -0.02 - 0.12), but this was only significantly lower than PET (Tukey  
322 comparison between slope of LDPE and PET:  $t = -4.12$ ,  $p = 0.0005$ ) and PVC (Tukey comparison  
323 between slope of LDPE and PVC:  $t = -3.92$ ,  $p = 0.013$ ).

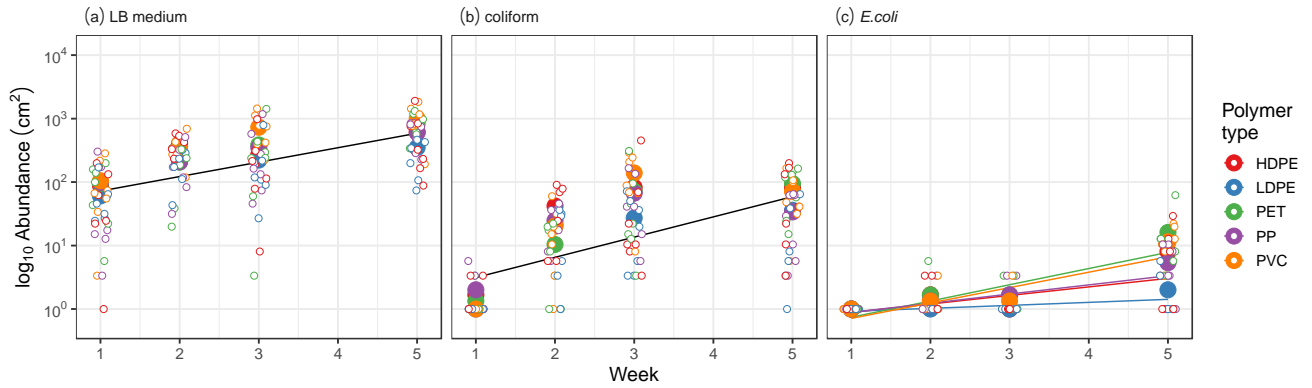

324

325 **Figure 3. Abundance of (a) bacteria on LB medium, (b) coliform bacteria and (c) *E.***

326 ***coli*, through five weeks of colonisation at the Falmouth Dockyard site. Small points**

327 **represent individual replicates and large points represent mean abundances on each plastic**

328 **at each week. Lines represent the predicted best fit from the model (see Methods), with the**

329 **single black line in (a) and (b) indicating that there is no effect of plastic on abundance.**

330

331 *Plastic biofilm community composition changes through time, but does not differ between polymer*

332 *types*

333 In addition to culture-dependent approaches, we performed 16S amplicon sequencing across all

334 four timepoints and plastic types for the colonisation experiment. Alpha diversity increased

335 during the first two weeks of colonisation, after which the number of unique ASVs remained

336 stable between weeks 2 and 5 (Figure 4a). This same pattern was seen in the evenness of the

337 biofilm communities, with abundances being more even across species in week 1 compared to

338 weeks 2 to 5 (Figure 4b) which is consistent with a scenario where a subset of taxa increases in

339 frequency over the course of plastic colonisation.

340 Bacterial community composition changed significantly over the course of the experiment

341 (PERMANOVA,  $F_{3,108} = 23.84$ ,  $R^2 = 0.38$ ,  $p = 0.001$ ) (Figure 5). The first principal coordinate

342 explained 22.0% of the total variation and separated the weeks, with the greatest difference

343 between week 1 and week 5. While there was no interaction between plastic and week, plastic

344 type significantly altered community composition when added alongside week (PERMANOVA,

345  $F_{4,108} = 1.85$ ,  $R^2 = 0.04$ ,  $p = 0.013$ ), although the amount of variation it accounted for was very

346 small (~4%). To further examine this effect, we ran multiple pairwise permutational ANOVAs on  
347 the entire dataset and within each week. We found no significant differences between any two  
348 plastics on the whole dataset or within each week (PERMANOVAs: all  $p_{adj} > 0.05$ ), indicating no  
349 consistent effects of plastic type. There were no overall differences in between-community  
350 diversity (beta-diversity) across weeks or plastics, with the simplest model being one with no  
351 predictor (Table S2).

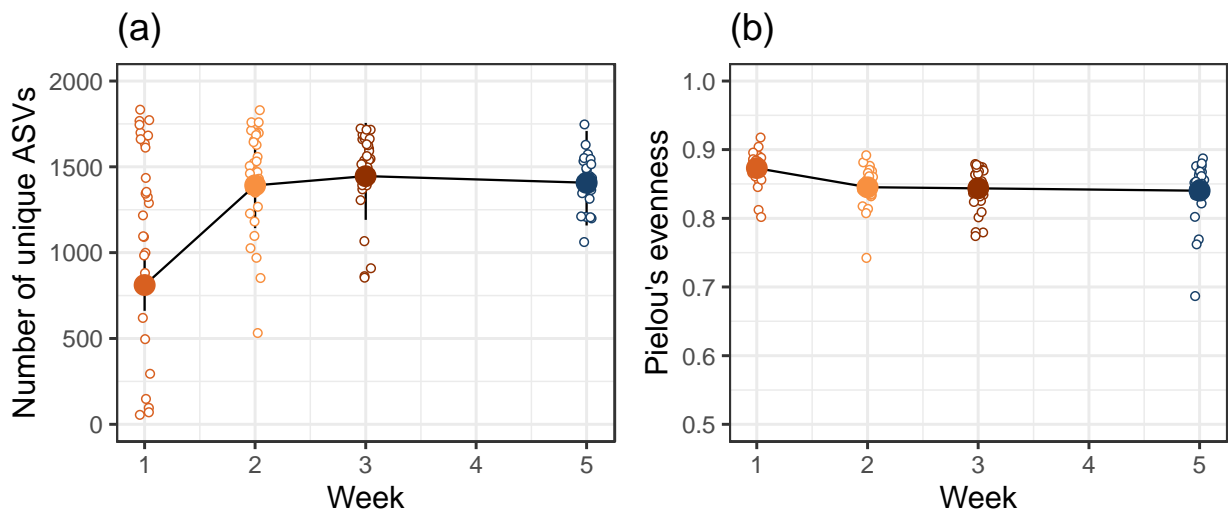

352  
353 **Figure 4. Change in (a) alpha diversity and (b) evenness of plastic biofilm**  
354 **communities.** (a) Alpha diversity increased from week 1 to week 2 and then remained  
355 stable. (b) At the same time, communities became more even, with the only difference in  
356 evenness occurring between week 1 and 2. In both panels, small points are individual  
357 replicates, large points and line bars represent estimates and 95% confidence intervals  
358 from the best model respectively (see Methods), and model estimates are joined by lines to  
359 help visualise differences between weeks.

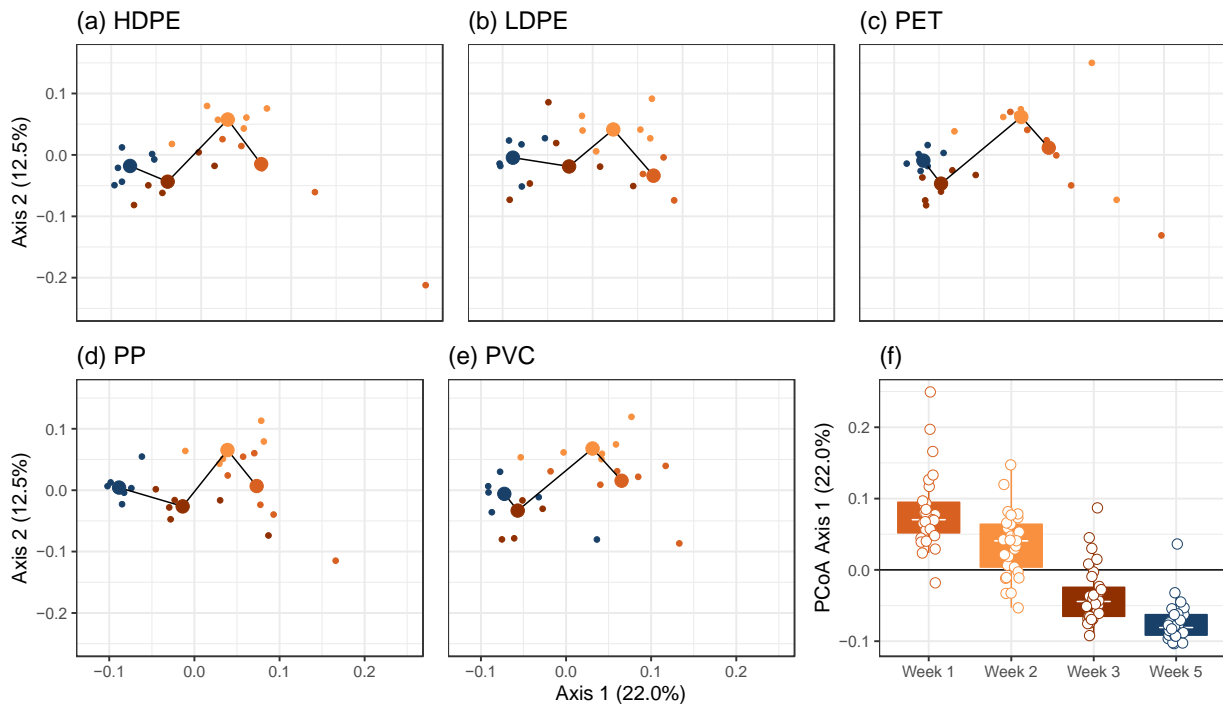

360

361

362

363

364

365

366

367

368

369

370

371

372

373

### 374 Virulence of plastic biofilm communities

375

376

**Figure 5. Changes in community composition through time (different colours) and between plastics (panels a-e).** (a-e) Principal Coordinate (PCoA) plot of communities based on weighted-Unifrac distance. Each panel represents biofilms from different polymer types and shows that community composition changes consistently through time irrespective of plastic type. The percentage of variation explained is shown on each axis (calculated from the relevant eigenvalues). (f) The separation of communities through time along PCoA axis 1 scores. In (a-e) small points are individual communities and large points are positions of centroids, with the black lines showing how centroid position changes through time. In (f) points are individual communities, tops and bottoms of the bars represent the 75<sup>th</sup> and 25<sup>th</sup> percentiles of the data. White lines are the medians, and the whiskers extend from the respective hinge to the smallest of largest value no further than 1.5\*interquartile range.

We employed a recently developed method where pathogenic bacteria from microbiome samples are selectively enriched using the *G. mellonella* wax moth larva virulence model (39). In the



377 location experiment, all hazard ratios between the different sites had credible intervals that  
378 crossed one, indicating non-significance at a traditional 0.95 level. However, biofilms from  
379 Falmouth Dockyard (mean time to death = 28.5 hours; proportion that died = 0.48) and Falmouth  
380 Wharf (mean time to death = 30.8 hours; proportion that died = 0.48) were 2.5 times more  
381 virulent than biofilms from Mylor Bank (mean time to death = 34.4 hours; proportion that died =  
382 0.32) (Figure 6a, Table S3). There was an 87% probability that the Dockyard and Wharf  
383 communities were more virulent than those from Mylor bank for both locations (Table S3).

384 In the colonisation experiment, biofilms from weeks 1, 2, and 3 killed only 4, 7, and 11%  
385 of *Galleria* respectively. In contrast, biofilms from week 5 were much more virulent, with 65% of  
386 *Galleria* dying during the assay. In both the location and colonisation experiments, we looked for  
387 differences in virulence between polymer types (Figure 6a). To classify a polymer type as having  
388 more or less virulent communities than others, it would need to have a higher (or lower) hazard  
389 ratio than average in both experiments (Table S3). There were no hazard ratios between polymer  
390 types that had 95% credible intervals that did not overlap with 1 for both experiments meaning  
391 that there were no significant differences in virulence between polymer types. However, we  
392 found evidence that LDPE communities are less virulent than other polymer types, with all hazard  
393 ratios being above 1 when LDPE was the baseline polymer type (Table S3), with an 89%  
394 probability (on average) of the other polymer type being more virulent. The four other polymer  
395 types did not have consistent differences in their hazard ratios.

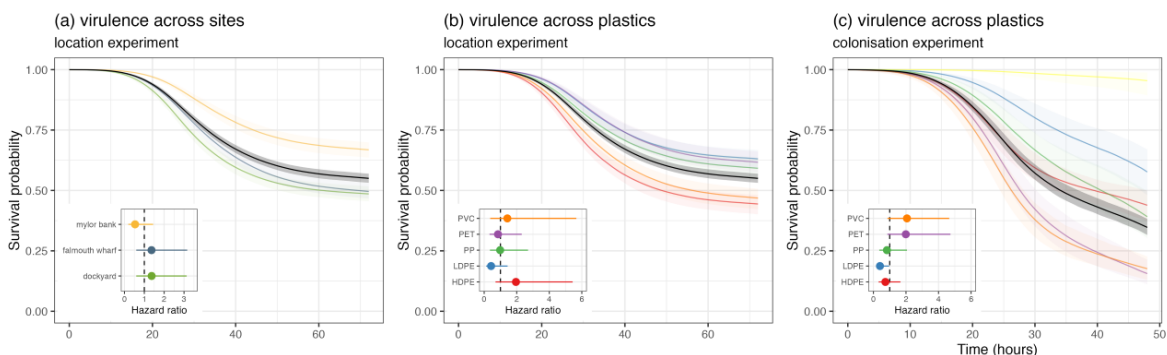

396

397 **Figure 6. Survival curves of *G. mellonella* inoculated with plastic biofilm communities**

398 **from (a, b) the location experiment and (c) the colonisation experiment. Across all**

399 panels, the black line and shaded region depicts the median virulence of a biofilm  
400 community from that experiment, and the median log hazard was used as the baseline for  
401 calculating hazard ratios. (a) Effect of location on virulence of biofilm communities. (b)  
402 Effect of polymer type on virulence of biofilm communities from the location experiment.  
403 (c) Effect of polymer type on virulence of biofilm communities from the colonisation  
404 experiment. Lines represent the median prediction and shaded bands represent 95%  
405 credible intervals of those predictions. Inset plots are the hazard ratio where the median  
406 hazard of the experiment is the baseline. In (c) bright yellow is the survival curve for *G.*  
407 *mellonella* injected with water.

408

#### 409 *The identity of putative human pathogens*

410 To obtain a more detailed picture of the taxonomic identity and antimicrobial resistance of  
411 individual pathogens in our plastic biofilm samples, we genome-sequenced 16 bacterial clones  
412 isolated from some of the most virulent biofilm communities spanning different locations and  
413 plastic types (Table 1). Eleven genome assemblies had high completion and low contamination  
414 and could be unambiguously assigned to a single bacterial species, but this was not the case for  
415 five remaining genome samples – which must have been due to the co-isolation of multiple clones.  
416 To retain as much information as possible, these assemblies were not discarded but were  
417 bioinformatically separated using the genome viewer Bandage, with assemblies split into non-  
418 contiguous sections (46). Using this approach, four contaminated genomes could be split into  
419 eight genomes (2 & 3, 6 & 7, 8 & 9, 15 & 16; Table 1). One remaining assembly (17; Table 1) could  
420 not be split because it only had one contiguous genome. Retaining a large chimeric assembly was  
421 also the case for (split) sample 16 and so for both assemblies multiple identities are presented  
422 instead of one (Table 1).

423 The most prevalent pathogen genus isolated was *Serratia* (Table 1), with several clones  
424 identified as *S. liquefaciens*, and *S. fonticola*, which are known human pathogens (59) that have  
425 previously been reported to occur commonly in soils in Cornwall using the *Galleria* enrichment

426 method (60). Other species identified were *Enterococcus faecalis* which is known to infect humans  
 427 (61), and *Bacillus licheniformis* which can cause opportunistic infections (e.g. (62)). Surprisingly,  
 428 no virulence genes were detected in any of the assemblies, although we used a relatively stringent  
 429 sequence similarity cut-off of 95%. However, a host of antimicrobial resistance genes belonging  
 430 to a variety of classes were uncovered (Table 2). These include genes conferring resistance to  
 431 clinically highly relevant antibiotics such as cephalosporins, aminoglycosides and trimethoprim  
 432 (in *E. faecalis*) (Table 2).

433

434 **Table 1** Genome characteristics of 20 clones isolated from plastics using the *Galleria*  
 435 enrichment method.

| isolate | plastic | site           | contig taxonomic assignment                                | 16S taxonomic assignment                | completeness | contamination | GC   | genome size (bp) | number of contigs | N50       | number of AMR genes |
|---------|---------|----------------|------------------------------------------------------------|-----------------------------------------|--------------|---------------|------|------------------|-------------------|-----------|---------------------|
| 1       | HDPE    | falmouth wharf | <i>Serratia liquefaciens</i>                               | <i>Serratia</i>                         | 100.00       | 0.89          | 0.55 | 5,549,824        | 78                | 327,206   | 2                   |
| 2       | HDPE    | falmouth wharf | <i>Serratia</i>                                            | <i>Raoultella/Enterobacter/Serratia</i> | 99.86        | 0.15          | 0.59 | 5,222,268        | 41                | 2,939,895 | 6                   |
| 3       | HDPE    | falmouth wharf | <i>Bacillus licheniformis</i>                              | <i>Bacillus licheniformis</i>           | 98.82        | 0.00          | 0.46 | 4,254,100        | 20                | 2,234,065 | 1                   |
| 4       | HDPE    | mylor bank     | <i>Serratia</i>                                            | <i>Serratia marcescens</i>              | 99.86        | 0.15          | 0.59 | 5,218,884        | 32                | 2,874,999 | 6                   |
| 5       | HDPE    | dockyard       | <i>Serratia liquefaciens</i>                               | <i>Serratia liquefaciens</i>            | 100.00       | 0.45          | 0.55 | 5,413,752        | 61                | 318,399   | 2                   |
| 6       | HDPE    | dockyard       | <i>Bacillus licheniformis</i>                              | <i>Bacillus licheniformis</i>           | 98.86        | 0.00          | 0.46 | 4,256,127        | 38                | 382,110   | 1                   |
| 7       | HDPE    | dockyard       | <i>Enterobacter/Enterobacteriaceae</i>                     | <i>Enterobacter/Cedecea</i>             | 98.78        | 0.60          | 0.56 | 5,014,388        | 240               | 160,006   | 3                   |
| 8       | LDPE    | dockyard       | <i>Bacillus/Enterobacter</i>                               | <i>Bacillus</i>                         | 99.45        | 8.63          | 0.47 | 4,977,695        | 35                | 1,096,327 | 1                   |
| 9       | LDPE    | dockyard       | <i>Enterobacter/Enterobacteriaceae</i>                     | <i>Enterobacter/Cedecea</i>             | 98.78        | 0.60          | 0.56 | 5,014,653        | 245               | 160,006   | 3                   |
| 10      | LDPE    | dockyard       | <i>Serratia</i>                                            | <i>Serratia marcescens</i>              | 99.86        | 0.15          | 0.59 | 5,218,582        | 30                | 2,874,999 | 6                   |
| 11      | LDPE    | dockyard       | <i>Serratia fonticola</i>                                  | <i>Serratia</i>                         | 99.94        | 0.29          | 0.54 | 5,756,538        | 113               | 185,130   | 1                   |
| 12      | LDPE    | falmouth wharf | <i>Enterococcus faecalis</i>                               | <i>Enterococcus faecalis</i>            | 99.63        | 0.00          | 0.37 | 2,864,632        | 53                | 175,637   | 2                   |
| 13      | PET     | dockyard       | <i>Serratia</i>                                            | <i>Serratia marcescens</i>              | 99.86        | 0.15          | 0.59 | 5,218,760        | 30                | 2,874,999 | 6                   |
| 14      | PP      | dockyard       | <i>Serratia</i>                                            | <i>Serratia marcescens</i>              | 99.86        | 0.15          | 0.59 | 5,218,875        | 33                | 2,875,113 | 6                   |
| 15      | PP      | dockyard       | <i>Bacillus licheniformis</i>                              | <i>Bacillus licheniformis</i>           | 97.30        | 0.31          | 0.46 | 4,145,137        | 31                | 438,169   | 1                   |
| 16      | PP      | dockyard       | <i>Klebsiella/Serratia/Enterobacter/Enterobacteriaceae</i> | <i>Enterobacter/Serratia</i>            | 97.93        | 188.43        | 0.57 | 15,957,883       | 573               | 182,752   | 10                  |
| 17      | PP      | dockyard       | <i>Serratia/Enterobacteriaceae</i>                         | -                                       | 99.66        | 95.89         | 0.56 | 11,471,120       | 188               | 336,395   | 7                   |
| 18      | PP      | falmouth wharf | <i>Serratia</i>                                            | <i>Serratia marcescens</i>              | 99.86        | 0.15          | 0.59 | 5,219,474        | 35                | 2,875,113 | 6                   |
| 19      | PVC     | dockyard       | <i>Serratia liquefaciens</i>                               | <i>Serratia liquefaciens</i>            | 100.00       | 0.45          | 0.55 | 5,571,931        | 37                | 398,855   | 2                   |
| 20      | PVC     | falmouth wharf | <i>Serratia liquefaciens</i>                               | <i>Serratia</i>                         | 100.00       | 0.45          | 0.56 | 5,131,311        | 33                | 531,913   | 2                   |

436

437

438  
439

**Table 2** Antimicrobial resistance genes present in 20 clones isolated from plastics using the *Galleria* enrichment method.

| isolate | AMR gene                                                                                                                                                                                                                                                                          | isolate | AMR gene                                                                                                                                                                                                                                                                                                                                                                                                                                                                                                        |
|---------|-----------------------------------------------------------------------------------------------------------------------------------------------------------------------------------------------------------------------------------------------------------------------------------|---------|-----------------------------------------------------------------------------------------------------------------------------------------------------------------------------------------------------------------------------------------------------------------------------------------------------------------------------------------------------------------------------------------------------------------------------------------------------------------------------------------------------------------|
| 1       | multidrug efflux RND transporter permease subunit SdeB<br>class C beta-lactamase                                                                                                                                                                                                  | 14      | multidrug efflux RND transporter permease subunit SdeY<br>multidrug efflux RND transporter permease subunit SdeB<br>class C beta-lactamase SRT-3<br>tetracycline efflux MFS transporter Tet(41)<br>multidrug efflux MFS transporter SmfY<br>aminoglycoside 6'-N-acetyltransferase                                                                                                                                                                                                                               |
| 2       | multidrug efflux RND transporter permease subunit SdeY<br>multidrug efflux RND transporter permease subunit SdeB<br>class C beta-lactamase SRT-3<br>tetracycline efflux MFS transporter Tet(41)<br>multidrug efflux MFS transporter SmfY<br>aminoglycoside 6'-N-acetyltransferase | 15      | class A beta-lactamase BlaP                                                                                                                                                                                                                                                                                                                                                                                                                                                                                     |
| 3       | class A beta-lactamase BlaP                                                                                                                                                                                                                                                       | 16      | multidrug efflux RND transporter permease subunit SdeB<br>multidrug efflux RND transporter permease subunit SdeY<br>multidrug efflux RND transporter permease subunit OqxB<br>phosphoethanolamine--lipid A transferase MCR-10.1<br>multidrug efflux MFS transporter SmfY<br>tetracycline efflux MFS transporter Tet(41)<br>class C beta-lactamase SRT-3<br>class A extended-spectrum beta-lactamase OXY-6-2<br>cephalosporin-hydrolyzing class C beta-lactamase MIR-12<br>aminoglycoside 6'-N-acetyltransferase |
| 4       | multidrug efflux MFS transporter SmfY<br>tetracycline efflux MFS transporter Tet(41)<br>class C beta-lactamase SRT-3<br>multidrug efflux RND transporter permease subunit SdeB<br>multidrug efflux RND transporter permease subunit SdeY<br>aminoglycoside 6'-N-acetyltransferase | 17      | multidrug efflux MFS transporter SmfY<br>tetracycline efflux MFS transporter Tet(41)<br>class C beta-lactamase SRT-3<br>multidrug efflux RND transporter permease subunit SdeB<br>multidrug efflux RND transporter permease subunit SdeY<br>aminoglycoside 6'-N-acetyltransferase<br>class A beta-lactamase FONA-6                                                                                                                                                                                              |
| 5       | multidrug efflux RND transporter permease subunit SdeB<br>class C beta-lactamase                                                                                                                                                                                                  | 18      | multidrug efflux MFS transporter SmfY<br>tetracycline efflux MFS transporter Tet(41)<br>class C beta-lactamase SRT-3<br>multidrug efflux RND transporter permease subunit SdeB<br>multidrug efflux RND transporter permease subunit SdeY<br>aminoglycoside 6'-N-acetyltransferase                                                                                                                                                                                                                               |
| 6       | class A beta-lactamase BlaP                                                                                                                                                                                                                                                       | 19      | class C beta-lactamase<br>multidrug efflux RND transporter permease subunit SdeB                                                                                                                                                                                                                                                                                                                                                                                                                                |
| 7       | cephalosporin-hydrolyzing class C beta-lactamase MIR-16<br>multidrug efflux RND transporter permease subunit OqxB9<br>fosfomicin resistance glutathione transferase FosA                                                                                                          | 20      | class C beta-lactamase<br>multidrug efflux RND transporter permease subunit SdeB                                                                                                                                                                                                                                                                                                                                                                                                                                |
| 8       | class A beta-lactamase BlaP                                                                                                                                                                                                                                                       |         |                                                                                                                                                                                                                                                                                                                                                                                                                                                                                                                 |
| 9       | cephalosporin-hydrolyzing class C beta-lactamase MIR-16<br>multidrug efflux RND transporter permease subunit OqxB9<br>fosfomicin resistance glutathione transferase FosA                                                                                                          |         |                                                                                                                                                                                                                                                                                                                                                                                                                                                                                                                 |
| 10      | multidrug efflux MFS transporter SmfY<br>tetracycline efflux MFS transporter Tet(41)<br>class C beta-lactamase SRT-3<br>multidrug efflux RND transporter permease subunit SdeB<br>multidrug efflux RND transporter permease subunit SdeY<br>aminoglycoside 6'-N-acetyltransferase |         |                                                                                                                                                                                                                                                                                                                                                                                                                                                                                                                 |
| 11      | class A beta-lactamase FONA-4                                                                                                                                                                                                                                                     |         |                                                                                                                                                                                                                                                                                                                                                                                                                                                                                                                 |
| 12      | trimethoprim-resistant dihydrofolate reductase DfrE<br>ABC-F type ribosomal protection protein Lsa(A)                                                                                                                                                                             |         |                                                                                                                                                                                                                                                                                                                                                                                                                                                                                                                 |
| 13      | multidrug efflux MFS transporter SmfY<br>tetracycline efflux MFS transporter Tet(41)<br>class C beta-lactamase SRT-3<br>multidrug efflux RND transporter permease subunit SdeB<br>multidrug efflux RND transporter permease subunit SdeY<br>aminoglycoside 6'-N-acetyltransferase |         |                                                                                                                                                                                                                                                                                                                                                                                                                                                                                                                 |

440

## 441 Discussion

442 There has been a recent flurry of research into the colonisation of marine plastics by bacteria, but  
443 our understanding of this process is still incomplete, especially regarding pathogenic bacteria. To  
444 help resolve ongoing debate, we submerged household plastics in the Fal Estuary (UK) and  
445 tracked bacterial colonisation as a function of plastic type, location, and time. Our results indicate  
446 that plastic colonisation in the coastal environment is largely independent of plastic type (LDPE,  
447 PE, PP, PVC and PET) with no or little effect on the number of culturable bacteria or 16S-based  
448 community composition across locations or time. The exception is LDPE, which showed lower  
449 colonisation rates in the location and colonisation experiments, although these differences were  
450 only significant compared to HDPE in the former and PET and PVC in the latter experiment (and  
451 only in the case of *E. coli* in the colonisation experiment). However, as LDPE-derived biofilms  
452 exhibited lower virulence in the *Galleria* model, it is possible that LDPE poses lower risks in terms  
453 of pathogen colonisation.

454 Bacterial colonisation of plastics occurred rapidly, with bacterial diversity reaching peak  
455 diversity after two weeks. Bacterial density increased with time and was highest at our final  
456 timepoint of five weeks - the only timepoint at which significant *Galleria* mortality indicated the  
457 presence of pathogenic bacteria. Our data thus suggest that total bacterial density, rather than  
458 community composition, is a better predictor of the virulence of plastic-associated biofilms.  
459 Bacterial plastic colonisation, including by pathogens, might be more rapid in summer months  
460 when higher water temperatures favour bacterial growth and persistence (63), although reduced  
461 rainfall in summer may result in lower input of terrestrial bacteria into the sea. Colonisation by  
462 bacteria likely to be of terrestrial origin (particularly those that are gut-associated and/or able to  
463 grow at 37°C on nutrient-rich medium) was more pronounced at the two locations closer to the  
464 shore and habitation, as expected. Future studies employing replicated transects could shed more  
465 light on the effect of coastal proximity on plastic colonisation.

466 Approaches to determine the presence of pathogenic bacteria on plastics are usually  
467 based on the ability to detect specific taxa that are selected a priori, typically via agar-based

468 isolation (e.g. 19)). By using selective enrichment in a proven virulence model, we were able to  
469 isolate virulent bacteria, including known human pathogens such as *Enterococcus faecalis*. This  
470 species is present in marine environments (64) and has been shown to successfully colonise LDPE  
471 in lab experiments (65), but to our knowledge this is the first time that this important nosocomial  
472 pathogen has been isolated from marine plastics. The genomes recovered from plastic biofilms  
473 harboured a wide variety of antimicrobial resistance genes, highlighting the importance of  
474 plastics as a reservoir for resistance.

475 Plastic pollution is unabating and human exposure to micro-plastics and their associated  
476 microbial communities is likely to increase even more rapidly with a higher incidence of flooding  
477 due to climate change. Our results show that different plastic types accumulate similar bacterial  
478 communities that include a range of known human pathogens, posing a potential risk to human  
479 health.

480

#### 481 **Acknowledgments**

482 We are extremely grateful to Emma Walker, Timothy Bage and the boat crew from the Cornwall  
483 Port Health Authority, for kindly coordinating experimentation and data collection in the Fal  
484 Estuary, and to Macaulay Winter for assistance in the lab. Genome sequencing was provided by  
485 MicrobesNG (<http://www.microbesng.com>). We acknowledge support from the National  
486 Environment Research Council (NERC; grants NE/T008083/1 and NE/R011524/1). AH was  
487 supported by a Biotechnology and Biological Sciences Research Council (BBSRC) David Phillips  
488 Fellowship (BB/N020146/1).

489

#### 490 **References**

- 491 1. Ritchie H, Roser M. Plastic pollution. Our World in Data. 2018.
- 492 2. Geyer R. Production, use, and fate of synthetic polymers. *Plastic waste and recycling*:  
493 Elsevier; 2020. p. 13-32.
- 494 3. Jambeck JR, Geyer R, Wilcox C, Siegler TR, Perryman M, Andrady A, et al. Plastic waste  
495 inputs from land into the ocean. *Science*. 2015;347(6223):768-71.
- 496 4. Hohn S, Acevedo-Trejos E, Abrams JF, de Moura JF, Spranz R, Merico A. The long-term  
497 legacy of plastic mass production. *Science of the Total Environment*. 2020;746:141115.

- 498 5. Duncan EM, Botterell ZL, Broderick AC, Galloway TS, Lindeque PK, Nuno A, et al. A global  
499 review of marine turtle entanglement in anthropogenic debris: a baseline for further action.  
500 *Endangered Species Research*. 2017;34:431-48.
- 501 6. Germanov ES, Marshall AD, Bejder L, Fossi MC, Loneragan NR. Microplastics: no small  
502 problem for filter-feeding megafauna. *Trends Ecol Evol*. 2018;33(4):227-32.
- 503 7. Potocka M, Bayer RC, Potocki M. Plastic pollution affects American lobsters, *Homarus*  
504 *americanus*. *Marine pollution bulletin*. 2019;138:545-8.
- 505 8. Lamb JB, Willis BL, Fiorenza EA, Couch CS, Howard R, Rader DN, et al. Plastic waste  
506 associated with disease on coral reefs. *Science*. 2018;359(6374):460-2.
- 507 9. Waring RH, Harris RM, Mitchell SC. Plastic contamination of the food chain: A threat to  
508 human health? *Maturitas*. 2018;115:64-8.
- 509 10. Van Cauwenberghe L, Janssen CR. Microplastics in bivalves cultured for human  
510 consumption. *Environmental pollution*. 2014;193:65-70.
- 511 11. Lehner R, Weder C, Petri-Fink A, Rothen-Rutishauser B. Emergence of nanoplastic in the  
512 environment and possible impact on human health. *Environmental science & technology*.  
513 2019;53(4):1748-65.
- 514 12. Wyles KJ, Pahl S, Thomas K, Thompson RC. Factors that can undermine the psychological  
515 benefits of coastal environments: exploring the effect of tidal state, presence, and type of litter.  
516 *Environment and Behavior*. 2016;48(9):1095-126.
- 517 13. Amaral-Zettler LA, Zettler ER, Mincer TJ. Ecology of the plastisphere. *Nature Reviews*  
518 *Microbiology*. 2020;18(3):139-51.
- 519 14. Harrison JP, Schratzberger M, Sapp M, Osborn AM. Rapid bacterial colonization of low-  
520 density polyethylene microplastics in coastal sediment microcosms. *BMC microbiology*.  
521 2014;14(1):1-15.
- 522 15. Lobelle D, Cunliffe M. Early microbial biofilm formation on marine plastic debris. *Marine*  
523 *pollution bulletin*. 2011;62(1):197-200.
- 524 16. Zettler ER, Mincer TJ, Amaral-Zettler LA. Life in the “plastisphere”: microbial communities  
525 on plastic marine debris. *Environmental science & technology*. 2013;47(13):7137-46.
- 526 17. Oberbeckmann S, Loeder MG, Gerds G, Osborn AM. Spatial and seasonal variation in  
527 diversity and structure of microbial biofilms on marine plastics in Northern European waters.  
528 *FEMS microbiology ecology*. 2014;90(2):478-92.
- 529 18. Ogonowski M, Motiei A, Ininbergs K, Hell E, Gerdes Z, Udekwu KI, et al. Evidence for  
530 selective bacterial community structuring on microplastics. *Environmental microbiology*.  
531 2018;20(8):2796-808.
- 532 19. Miao L, Wang P, Hou J, Yao Y, Liu Z, Liu S, et al. Distinct community structure and microbial  
533 functions of biofilms colonizing microplastics. *Science of the Total Environment*. 2019;650:2395-  
534 402.
- 535 20. Keszy K, Oberbeckmann S, Kreikemeyer B, Labrenz M. Spatial environmental  
536 heterogeneity determines young biofilm assemblages on microplastics in Baltic Sea mesocosms.  
537 *Frontiers in microbiology*. 2019;10:1665.
- 538 21. Hansen J, Melchiorsen J, Ciacotich N, Gram L, Sonnenschein EC. Effect of polymer type on  
539 the colonization of plastic pellets by marine bacteria. *FEMS microbiology letters*.  
540 2021;368(5):fnab026.
- 541 22. Frère L, Maignien L, Chalopin M, Huvet A, Rinnert E, Morrison H, et al. Microplastic  
542 bacterial communities in the Bay of Brest: Influence of polymer type and size. *Environmental*  
543 *pollution*. 2018;242:614-25.
- 544 23. Amaral-Zettler LA, Zettler ER, Slikas B, Boyd GD, Melvin DW, Morrall CE, et al. The  
545 biogeography of the Plastisphere: implications for policy. *Frontiers in Ecology and the*  
546 *Environment*. 2015;13(10):541-6.
- 547 24. Muthukrishnan T, Al Khaburi M, Abed RM. Fouling microbial communities on plastics  
548 compared with wood and steel: are they substrate-or location-specific? *Microbial ecology*.  
549 2019;78(2):361-74.

- 550 25. Oberbeckmann S, Kreikemeyer B, Labrenz M. Environmental factors support the  
551 formation of specific bacterial assemblages on microplastics. *Frontiers in microbiology*.  
552 2018;8:2709.
- 553 26. Radisic V, Nimje PS, Bienfait AM, Marathe NP. Marine plastics from Norwegian west coast  
554 carry potentially virulent fish pathogens and opportunistic human pathogens harboring new  
555 variants of antibiotic resistance genes. *Microorganisms*. 2020;8(8):1200.
- 556 27. Viršek MK, Lovšin MN, Koren Š, Kržan A, Peterlin M. Microplastics as a vector for the  
557 transport of the bacterial fish pathogen species *Aeromonas salmonicida*. *Marine pollution*  
558 *bulletin*. 2017;125(1-2):301-9.
- 559 28. Wu X, Pan J, Li M, Li Y, Bartlam M, Wang Y. Selective enrichment of bacterial pathogens by  
560 microplastic biofilm. *Water research*. 2019;165:114979.
- 561 29. Silva MM, Maldonado GC, Castro RO, de Sá Felizardo J, Cardoso RP, Dos Anjos RM, et al.  
562 Dispersal of potentially pathogenic bacteria by plastic debris in Guanabara Bay, RJ, Brazil. *Marine*  
563 *pollution bulletin*. 2019;141:561-8.
- 564 30. Kirstein IV, Kirmizi S, Wichels A, Garin-Fernandez A, Erler R, Martin L, et al. Dangerous  
565 hitchhikers? Evidence for potentially pathogenic *Vibrio* spp. on microplastic particles. *Marine*  
566 *environmental research*. 2016;120:1-8.
- 567 31. Rasool FN, Saavedra MA, Pamba S, Perold V, Mmochi AJ, Maalim M, et al. Isolation and  
568 characterization of human pathogenic multidrug resistant bacteria associated with plastic litter  
569 collected in Zanzibar. *Journal of Hazardous Materials*. 2021;405:124591.
- 570 32. Arias-Andres M, Klümper U, Rojas-Jimenez K, Grossart H-P. Microplastic pollution  
571 increases gene exchange in aquatic ecosystems. *Environmental Pollution*. 2018;237:253-61.
- 572 33. Teuten EL, Rowland SJ, Galloway TS, Thompson RC. Potential for plastics to transport  
573 hydrophobic contaminants. *Environmental science & technology*. 2007;41(22):7759-64.
- 574 34. Vos M. The evolution of bacterial pathogens in the Anthropocene. *Infection, Genetics and*  
575 *Evolution*. 2020:104611.
- 576 35. Bowley J, Baker-Austin C, Porter A, Hartnell R, Lewis C. Oceanic hitchhikers—assessing  
577 pathogen risks from marine microplastic. *Trends in microbiology*. 2020.
- 578 36. Keswani A, Oliver DM, Gutierrez T, Quilliam RS. Microbial hitchhikers on marine plastic  
579 debris: human exposure risks at bathing waters and beach environments. *Marine environmental*  
580 *research*. 2016;118:10-9.
- 581 37. Parthasarathy A, Tyler AC, Hoffman MJ, Savka MA, Hudson AO. Is plastic pollution in  
582 aquatic and terrestrial environments a driver for the transmission of pathogens and the evolution  
583 of antibiotic resistance? : ACS Publications; 2019.
- 584 38. Leonard AFC, Zhang L, Balfour AJ, Garside R, Hawkey PM, Murray AK, et al. Exposure to  
585 and colonisation by antibiotic-resistant *E. coli* in UK coastal water users: Environmental  
586 surveillance, exposure assessment, and epidemiological study (Beach Bum Survey). *Environment*  
587 *international*. 2018;114:326-33.
- 588 39. Hernandez RJ, Hesse E, Dowling AJ, Coyle NM, Feil EJ, Gaze WH, et al. Using the Wax moth  
589 larva *Galleria mellonella* infection model to detect emerging bacterial pathogens. *PeerJ*.  
590 2019;6:e6150.
- 591 40. Martin M. Cutadapt removes adapter sequences from high-throughput sequencing reads.  
592 *EMBnet journal*. 2011;17(1):10-2.
- 593 41. Team RC. R: A language and environment for statistical computing. 2013.
- 594 42. Callahan BJ, McMurdie PJ, Rosen MJ, Han AW, Johnson AJA, Holmes SP. DADA2: high-  
595 resolution sample inference from Illumina amplicon data. *Nature methods*. 2016;13(7):581.
- 596 43. McMurdie PJ, Holmes S. phyloseq: an R package for reproducible interactive analysis and  
597 graphics of microbiome census data. *Plos One*. 2013;8(4):e61217.
- 598 44. Quast C, Pruesse E, Yilmaz P, Gerken J, Schweer T, Yarza P, et al. The SILVA ribosomal RNA  
599 gene database project: improved data processing and web-based tools. *Nucleic acids research*.  
600 2012;41(D1):D590-D6.
- 601 45. Price MN, Dehal PS, Arkin AP. FastTree 2—approximately maximum-likelihood trees for  
602 large alignments. *Plos One*. 2010;5(3):e9490.



- 603 46. Bolger AM, Lohse M, Usadel B. Trimmomatic: a flexible trimmer for Illumina sequence  
604 data. *Bioinformatics*. 2014;30(15):2114-20.
- 605 47. Wick RR, Judd LM, Gorrie CL, Holt KE. Unicycler: resolving bacterial genome assemblies  
606 from short and long sequencing reads. *Plos Comput Biol*. 2017;13(6):e1005595.
- 607 48. Parks DH, Imelfort M, Skennerton CT, Hugenholtz P, Tyson GW. CheckM: assessing the  
608 quality of microbial genomes recovered from isolates, single cells, and metagenomes. *Genome*  
609 *Res*. 2015;25(7):1043-55.
- 610 49. Wick RR, Schultz MB, Zobel J, Holt KE. Bandage: interactive visualization of de novo  
611 genome assemblies. *Bioinformatics*. 2015;31(20):3350-2.
- 612 50. Seemann T. Prokka: rapid prokaryotic genome annotation. *Bioinformatics*.  
613 2014;30(14):2068-9.
- 614 51. Steinegger M, Söding J. MMseqs2 enables sensitive protein sequence searching for the  
615 analysis of massive data sets. *Nature biotechnology*. 2017;35(11):1026-8.
- 616 52. Chaumeil P-A, Mussig AJ, Hugenholtz P, Parks DH. GTDB-Tk: a toolkit to classify genomes  
617 with the Genome Taxonomy Database. Oxford University Press; 2020.
- 618 53. Callahan BJ, McMurdie PJ, Rosen MJ, Han AW, Johnson AJA, Holmes SP. DADA2: high-  
619 resolution sample inference from Illumina amplicon data. *Nature methods*. 2016;13(7):581-3.
- 620 54. Feldgarden M, Brover V, Gonzalez-Escalona N, Frye JG, Haendiges J, Haft DH, et al.  
621 AMRFinderPlus and the Reference Gene Catalog facilitate examination of the genomic links  
622 among antimicrobial resistance, stress response, and virulence. *Scientific Reports*. 2021;11(1):1-  
623 9.
- 624 55. Wickham H, Wickham MH. The ggplot package. Google Scholar; 2007.
- 625 56. Lenth R, Singmann H, Love J, Buerkner P, Herve M. Emmeans: Estimated marginal means,  
626 aka least-squares means. R package version. 2018;1(1):3.
- 627 57. Brilleman SL, Elci EM, Novik JB, Wolfe R. Bayesian survival analysis using the rstanarm R  
628 package. arXiv preprint arXiv:200209633. 2020.
- 629 58. Kay M. tidybayes: Tidy data and geoms for Bayesian models. R package version.  
630 2019;1(0).
- 631 59. Lozupone C, Knight R. UniFrac: a new phylogenetic method for comparing microbial  
632 communities. *Applied and environmental microbiology*. 2005;71(12):8228-35.
- 633 60. Oksanen J, Blanchet FG, Kindt R, Legendre P, Minchin PR, O'hara R, et al. Package 'vegan'.  
634 *Community ecology package*, version. 2013;2(9):1-295.
- 635 61. Benjamini Y, Hochberg Y. Controlling the false discovery rate: a practical and powerful  
636 approach to multiple testing. *Journal of the Royal statistical society: series B (Methodological)*.  
637 1995;57(1):289-300.
- 638 62. Pielou EC. Species-diversity and pattern-diversity in the study of ecological succession.  
639 *Journal of theoretical biology*. 1966;10(2):370-83.
- 640 63. Garneau MÈ, Roy S, Lovejoy C, Gratton Y, Vincent WF. Seasonal dynamics of bacterial  
641 biomass and production in a coastal arctic ecosystem: Franklin Bay, western Canadian Arctic.  
642 *Journal of Geophysical Research: Oceans*. 2008;113(C7).
- 643 64. Ferguson D, Moore D, Getrich M, Zhouwandai M. Enumeration and speciation of  
644 enterococci found in marine and intertidal sediments and coastal water in southern California.  
645 *Journal of Applied Microbiology*. 2005;99(3):598-608.
- 646 65. Hchaichi I, Bandini F, Spini G, Banni M, Coconcelli PS, Puglisi E. *Enterococcus faecalis* and  
647 *Vibrio harveyi* colonize low-density polyethylene and biodegradable plastics under marine  
648 conditions. *FEMS Microbiology Letters*. 2020;367(15):fnaa125.

649

650 **Supplementary Information for: Bacterial colonisation dynamics of household plastics in**  
 651 **a coastal environment**

652

653 **Table S1. Tukey pairwise comparisons of cultural abundance of bacteria on LB**  
 654 **media, coliform media, and *E. coli* from the location experiment.** Results of multiple  
 655 comparisons from the best model looking at differences between location and polymer  
 656 type. Significant p values are highlighted in bold.

657

| type          | contrast                    | estimate | SE    | df.    | t ratio | p value          |
|---------------|-----------------------------|----------|-------|--------|---------|------------------|
| LB media      | dockyard - falmouth wharf   | 0.613    | 0.125 | 83     | 4.911   | <b>&lt;0.001</b> |
|               | dockyard - mylor bank       | 1.464    | 0.125 | 83     | 11.723  | <b>&lt;0.001</b> |
|               | falmouth wharf - mylor bank | 0.851    | 0.125 | 83     | 6.812   | <b>&lt;0.001</b> |
|               | HDPE - LDPE                 | 0.623    | 0.161 | 83     | 3.864   | <b>0.002</b>     |
|               | HDPE - PET                  | 0.553    | 0.161 | 83     | 3.43    | <b>0.008</b>     |
|               | HDPE - PP                   | 0.499    | 0.161 | 83     | 3.097   | <b>0.022</b>     |
|               | HDPE - PVC                  | 0.432    | 0.161 | 83     | 2.679   | 0.066            |
|               | LDPE - PET                  | -0.07    | 0.161 | 83     | -0.434  | 0.992            |
|               | LDPE - PP                   | -0.124   | 0.161 | 83     | -0.767  | 0.939            |
|               | LDPE - PVC                  | -0.191   | 0.161 | 83     | -1.185  | 0.76             |
|               | PET - PP                    | -0.054   | 0.161 | 83     | -0.333  | 0.997            |
|               | PET - PVC                   | -0.121   | 0.161 | 83     | -0.751  | 0.944            |
| PP - PVC      | -0.067                      | 0.161    | 83    | -0.418 | 0.993   |                  |
| coliform      | dockyard - falmouth wharf   | 0.549    | 0.157 | 83     | 3.5     | <b>0.002</b>     |
|               | dockyard - mylor bank       | 1.608    | 0.157 | 83     | 10.254  | <b>&lt;0.001</b> |
|               | falmouth wharf - mylor bank | 1.059    | 0.157 | 83     | 6.755   | <b>&lt;0.001</b> |
|               | HDPE - LDPE                 | 0.787    | 0.202 | 83     | 3.886   | <b>0.002</b>     |
|               | HDPE - PET                  | 0.518    | 0.202 | 83     | 2.56    | 0.087            |
|               | HDPE - PP                   | 0.549    | 0.202 | 83     | 2.71    | 0.061            |
|               | HDPE - PVC                  | 0.411    | 0.202 | 83     | 2.028   | 0.262            |
|               | LDPE - PET                  | -0.268   | 0.202 | 83     | -1.325  | 0.676            |
|               | LDPE - PP                   | -0.238   | 0.202 | 83     | -1.175  | 0.765            |
|               | LDPE - PVC                  | -0.376   | 0.202 | 83     | -1.858  | 0.348            |
|               | PET - PP                    | 0.03     | 0.202 | 83     | 0.15    | 1                |
|               | PET - PVC                   | -0.108   | 0.202 | 83     | -0.532  | 0.984            |
| PP - PVC      | -0.138                      | 0.202    | 83    | -0.682 | 0.96    |                  |
| <i>E.coli</i> | dockyard - falmouth wharf   | 0.549    | 0.157 | 83     | 3.5     | <b>0.002</b>     |
|               | dockyard - mylor bank       | 1.608    | 0.157 | 83     | 10.254  | <b>&lt;0.001</b> |
|               | falmouth wharf - mylor bank | 1.059    | 0.157 | 83     | 6.755   | <b>&lt;0.001</b> |
|               | HDPE - LDPE                 | 0.787    | 0.202 | 83     | 3.886   | <b>0.002</b>     |
|               | HDPE - PET                  | 0.518    | 0.202 | 83     | 2.56    | 0.087            |
|               | HDPE - PP                   | 0.549    | 0.202 | 83     | 2.71    | 0.061            |
|               | HDPE - PVC                  | 0.411    | 0.202 | 83     | 2.028   | 0.262            |
|               | LDPE - PET                  | -0.268   | 0.202 | 83     | -1.325  | 0.676            |
|               | LDPE - PP                   | -0.238   | 0.202 | 83     | -1.175  | 0.765            |
|               | LDPE - PVC                  | -0.376   | 0.202 | 83     | -1.858  | 0.348            |
|               | PET - PP                    | 0.03     | 0.202 | 83     | 0.15    | 1                |
|               | PET - PVC                   | -0.108   | 0.202 | 83     | -0.532  | 0.984            |
| PP - PVC      | -0.138                      | 0.202    | 83    | -0.682 | 0.96    |                  |

658  
659

660 **Table S2. Results of the analysis of beta-diversity of community composition between**  
661 **weeks and plastic type.**

| model                                   | <i>df.</i> | AIC     | Log Lik | ANOVA comparison | <i>F</i> | <i>P</i> |
|-----------------------------------------|------------|---------|---------|------------------|----------|----------|
| 1 distance to centroid ~ week * plastic | 19         | -360.93 | 201.47  |                  |          |          |
| 2 distance to centroid ~ week + plastic | 7          | -371.21 | 194.60  | 1,2              | 1.00     | 0.451    |
| 3 distance to centroid ~ week           | 3          | -378.96 | 194.48  | 2,3              | 0.06     | 0.994    |
| 4 distance to centroid ~ plastic        | 4          | -369.41 | 190.71  | 2,4              | 2.50     | 0.063    |
| 5 distance to centroid ~ 1              |            | -377.10 | 190.55  | 3,5              | 2.62     | 0.055    |
| 5 distance to centroid ~ 1              |            | -377.10 | 190.55  | 4,5              | 0.07     | 0.990    |

662

663

664 **Table S3. Hazard ratios between locations and plastics for both experiments.**

665 Probability above 1 is the probability that the first location/polymer type is more virulent

666 than the baseline location/polymer type.

| contrast                      | experiment              | Hazard ratio |      |       | Probability above 1 |
|-------------------------------|-------------------------|--------------|------|-------|---------------------|
|                               |                         | Median       | 2.5% | 97.5% |                     |
| dockyard vs. falmouth wharf   | location experiment     | 1.00         | 0.28 | 3.76  | 0.50                |
| dockyard vs. mylor bank       | location experiment     | 2.57         | 0.51 | 12.98 | 0.87                |
| falmouth wharf vs. mylor bank | location experiment     | 2.55         | 0.49 | 13.35 | 0.87                |
| HDPE vs. LDPE                 | location experiment     | 4.57         | 0.88 | 23.79 | 0.97                |
|                               | colonisation experiment | 1.83         | 0.46 | 6.70  | 0.80                |
| HDPE vs. PET                  | location experiment     | 2.29         | 0.44 | 11.12 | 0.85                |
|                               | colonisation experiment | 0.37         | 0.10 | 1.35  | 0.06                |
| HDPE vs. PP                   | location experiment     | 1.99         | 0.41 | 9.04  | 0.81                |
|                               | colonisation experiment | 0.87         | 0.23 | 3.27  | 0.41                |
| HDPE vs. PVC                  | location experiment     | 1.37         | 0.19 | 9.09  | 0.63                |
|                               | colonisation experiment | 0.35         | 0.10 | 1.29  | 0.06                |
| PET vs. LDPE                  | location experiment     | 1.97         | 0.33 | 13.64 | 0.78                |
|                               | colonisation experiment | 5.02         | 1.22 | 19.15 | 0.99                |
| PP vs. LDPE                   | location experiment     | 2.31         | 0.39 | 13.73 | 0.83                |
|                               | colonisation experiment | 2.05         | 0.56 | 8.27  | 0.86                |
| PP vs. PET                    | location experiment     | 1.17         | 0.29 | 4.43  | 0.58                |
|                               | colonisation experiment | 0.42         | 0.11 | 1.61  | 0.11                |
| PVC vs. LDPE                  | location experiment     | 3.34         | 0.43 | 30.79 | 0.88                |
|                               | colonisation experiment | 5.06         | 1.30 | 19.74 | 0.99                |
| PVC vs. PET                   | location experiment     | 1.68         | 0.28 | 10.34 | 0.72                |
|                               | colonisation experiment | 1.05         | 0.28 | 3.78  | 0.53                |
| PVC vs. PP                    | location experiment     | 1.46         | 0.21 | 11.35 | 0.65                |
|                               | colonisation experiment | 2.47         | 0.60 | 9.17  | 0.91                |

667
